# Supplementary material for: Expanding the Toolbox for Bicelle-Forming Surfactant–Lipid Mixtures
Source: MDPI journal article supplement (doi:10.3390/molecules27217628), 2022-11-07
Supplement: s1 [file s1]

## Supporting Information

**Table S1.** Chemical composition, molecular volumes and electron densities of the lipids and detergent components. a is from [34], b is from [35], c was from [36] and d was estimated using the VegaZZ software [37].

| Component  | Chemical formula                                                | Molecular volume (Å <sup>3</sup> ) | Electron density (e <sup>-</sup> /Å <sup>3</sup> ) |
|------------|-----------------------------------------------------------------|------------------------------------|----------------------------------------------------|
| DMPC tails | C <sub>26</sub> H <sub>54</sub>                                 | 779.8 <sup>a</sup>                 | 0.269                                              |
| DMPC heads | C <sub>10</sub> H <sub>18</sub> NO <sub>8</sub> P               | 320.9 <sup>a</sup>                 | 0.489                                              |
| DMPG heads | C <sub>8</sub> H <sub>12</sub> O <sub>10</sub> P                | 283.0 <sup>b</sup>                 | 0.494                                              |
| POPC tails | C <sub>32</sub> H <sub>64</sub>                                 | 937.2 <sup>a</sup>                 | 0.273                                              |
| DHPC tails | C <sub>10</sub> H <sub>22</sub>                                 | 330.2 <sup>a</sup>                 | 0.248                                              |
| CHAPS      | C <sub>32</sub> H <sub>58</sub> N <sub>2</sub> O <sub>7</sub> S | 830.3 <sup>c</sup>                 | 0.405                                              |
| Cholate    | C <sub>24</sub> H <sub>39</sub> O <sub>5</sub>                  | 473.0 <sup>d</sup>                 | 0.471                                              |

**Table S2.** Complete list of the values describing the fits obtained for the curves shown in Figure 3, Figure 5 and Figure S2 and plotted in Figure 4B, Figure 5B and Figure S7.

| q             | Scale    | BKG      | Radius | X_core | Thick_rim | Thick_face | Length | SLD_core | SLD_face | SLD_rim | SLD_solvent | Belt_rough | ChiSq |
|---------------|----------|----------|--------|--------|-----------|------------|--------|----------|----------|---------|-------------|------------|-------|
| DMPC_CHAPS    |          |          |        |        |           |            |        |          |          |         |             |            |       |
| 0.5           | 1.25E-02 | 6.28E-04 | 19.6   | 0.705  | 10.7      | 6.4        | 19.8   | 7.6      | 11.85    | 11.18   | 9.27        | 3          | 1.27  |
| 1             | 8.69E-03 | 4.32E-04 | 26.0   | 0.667  | 8.8       | 9.5        | 24.1   | 7.6      | 11.74    | 11.29   | 9.27        | 3          | 1.34  |
| 1.5           | 7.35E-03 | 2.61E-04 | 31.4   | 0.685  | 8.0       | 10.3       | 23.3   | 7.6      | 11.80    | 11.25   | 9.27        | 3          | 1.45  |
| 2             | 6.73E-03 | 2.67E-04 | 34.5   | 0.675  | 7.8       | 10.5       | 23.8   | 7.6      | 11.83    | 11.23   | 9.27        | 3          | 1.65  |
| 2.5           | 6.34E-03 | 2.61E-04 | 34.8   | 0.672  | 8.4       | 9.7        | 24.5   | 7.6      | 11.89    | 11.27   | 9.27        | 3          | 1.90  |
| 3             | 6.13E-03 | 2.60E-04 | 37.3   | 0.654  | 8.3       | 10.0       | 24.7   | 7.6      | 11.84    | 11.26   | 9.27        | 3          | 1.73  |
| 5             | 5.67E-03 | 2.16E-04 | 39.0   | 0.688  | 8.6       | 9.9        | 25.0   | 7.6      | 11.88    | 11.23   | 9.27        | 3          | 1.82  |
| DMPC_Chol     |          |          |        |        |           |            |        |          |          |         |             |            |       |
| 0.5           | 8.89E-03 | 1.00E-03 | 12.4   | 0.884  | 12.2      | 4.0        | 14.9   | 7.6      | 11.00    | 11.27   | 9.27        | 3          | 1.46  |
| 1             | 7.69E-03 | 7.00E-04 | 15.8   | 0.832  | 10.4      | 4.5        | 20.8   | 7.6      | 11.17    | 11.43   | 9.27        | 3          | 1.46  |
| 1.5           | 6.33E-03 | 7.00E-04 | 22.2   | 0.920  | 4.2       | 11.5       | 17.6   | 7.6      | 11.69    | 11.42   | 9.27        | 3          | 1.46  |
| 2             | 5.92E-03 | 7.50E-04 | 23.0   | 0.877  | 4.4       | 11.5       | 18.2   | 7.6      | 11.72    | 11.40   | 9.27        | 3          | 1.38  |
| 2.5           | 5.83E-03 | 6.00E-04 | 24.0   | 0.919  | 4.3       | 10.8       | 18.9   | 7.6      | 11.97    | 11.22   | 9.27        | 3          | 1.37  |
| 3             | 5.38E-03 | 6.80E-04 | 25.6   | 0.843  | 4.0       | 10.3       | 19.9   | 7.6      | 12.09    | 11.54   | 9.27        | 3          | 1.36  |
| 5             | 5.38E-03 | 6.80E-04 | 25.6   | 0.843  | 4.0       | 10.3       | 19.9   | 7.6      | 12.09    | 11.54   | 9.27        | 3          | 1.36  |
| DMPC_DHPC     |          |          |        |        |           |            |        |          |          |         |             |            |       |
| 0.5           | 1.07E-02 | 5.45E-04 | 30.1   | 0.694  | 4.5       | 8.3        | 24.4   | 7.6      | 11.63    | 11.97   | 9.27        | 3          | 1.52  |
| 1             | 8.02E-03 | 3.96E-04 | 41.2   | 0.738  | 4.3       | 9.6        | 24.2   | 7.6      | 11.60    | 11.78   | 9.27        | 3          | 1.43  |
| 1.5           | 6.71E-03 | 2.14E-04 | 45.6   | 0.728  | 4.3       | 9.4        | 25.3   | 7.6      | 11.81    | 11.81   | 9.27        | 3          | 1.31  |
| 2             | 6.45E-03 | 2.00E-04 | 46.5   | 0.769  | 4.3       | 9.7        | 25.6   | 7.6      | 11.83    | 11.78   | 9.27        | 3          | 1.51  |
| 2.5           | 6.06E-03 | 2.66E-04 | 46.6   | 0.802  | 4.1       | 10.0       | 25.7   | 7.6      | 11.77    | 11.81   | 9.27        | 3          | 1.70  |
| 3             | 5.89E-03 | 2.16E-04 | 45.1   | 0.888  | 4.1       | 10.1       | 25.7   | 7.6      | 11.83    | 11.59   | 9.27        | 3          | 1.64  |
| 5             | 5.56E-03 | 2.68E-04 | 50.1   | 0.830  | 4.1       | 10.5       | 25.6   | 7.6      | 11.78    | 11.48   | 9.27        | 3          | 1.92  |
| DMPC_PG_CHAPS |          |          |        |        |           |            |        |          |          |         |             |            |       |
| 0.5           | 1.07E-02 | 8.85E-04 | 20.2   | 0.627  | 10.9      | 7.4        | 22.0   | 7.6      | 11.79    | 11.28   | 9.27        | 3          | 2.15  |
| 1             | 7.80E-03 | 5.11E-04 | 27.8   | 0.635  | 9.1       | 10.0       | 23.3   | 7.6      | 11.86    | 11.26   | 9.27        | 3          | 1.65  |
| 1.5           | 6.80E-03 | 3.06E-04 | 31.6   | 0.684  | 8.5       | 10.7       | 23.6   | 7.6      | 11.80    | 11.27   | 9.27        | 3          | 1.55  |
| 2             | 6.30E-03 | 3.02E-04 | 35.1   | 0.670  | 8.5       | 10.8       | 23.8   | 7.6      | 11.80    | 11.23   | 9.27        | 3          | 1.33  |
| 2.5           | 6.00E-03 | 3.34E-04 | 37.1   | 0.700  | 8.0       | 10.5       | 24.2   | 7.6      | 11.98    | 11.21   | 9.27        | 3          | 1.40  |
| 3             | 5.80E-03 | 3.00E-04 | 39.8   | 0.667  | 8.1       | 11.0       | 24.0   | 7.6      | 11.83    | 11.24   | 9.27        | 3          | 2.00  |
| 5             | 5.50E-03 | 2.17E-04 | 40.9   | 0.725  | 9.6       | 11.1       | 24.1   | 7.6      | 11.74    | 11.04   | 9.27        | 3          | 1.68  |
| DMPC_PG_Chol  |          |          |        |        |           |            |        |          |          |         |             |            |       |
| 0.5           | 9.15E-03 | 1.00E-03 | 13.1   | 0.938  | 11.5      | 4.1        | 15.8   | 7.6      | 11.50    | 11.33   | 9.27        | 3          | 2.48  |
| 1             | 7.58E-03 | 9.38E-04 | 17.6   | 0.661  | 10.5      | 4.1        | 24.8   | 7.6      | 11.82    | 11.32   | 9.27        | 3          | 2.38  |
| 1.5           | 6.11E-03 | 7.50E-04 | 23.4   | 0.869  | 4.1       | 11.6       | 18.0   | 7.6      | 11.85    | 11.39   | 9.27        | 3          | 1.44  |
| 2             | 6.08E-03 | 7.10E-04 | 24.7   | 0.869  | 4.1       | 11.6       | 18.3   | 7.6      | 11.88    | 11.25   | 9.27        | 3          | 1.46  |
| 2.5           | 5.75E-03 | 9.22E-04 | 26.1   | 0.847  | 4.7       | 10.9       | 19.5   | 7.6      | 12.12    | 11.03   | 9.27        | 3          | 1.78  |
| 3             | 5.70E-03 | 7.14E-04 | 25.0   | 0.880  | 4.7       | 10.3       | 19.9   | 7.6      | 12.26    | 11.15   | 9.27        | 3          | 1.42  |
| 5             | 5.55E-03 | 7.00E-04 | 24.3   | 0.976  | 4.5       | 10.8       | 19.6   | 7.6      | 12.08    | 11.16   | 9.27        | 3          | 1.53  |
| DMPC_PG_DHPC  |          |          |        |        |           |            |        |          |          |         |             |            |       |
| 0.5           | 1.08E-02 | 6.78E-04 | 32.4   | 0.694  | 4.3       | 9.4        | 23.4   | 7.6      | 11.57    | 11.85   | 9.27        | 3          | 1.25  |
| 1             | 7.67E-03 | 4.41E-04 | 45.6   | 0.630  | 4.3       | 9.7        | 24.7   | 7.6      | 11.69    | 11.86   | 9.27        | 3          | 1.43  |
| 1.5           | 6.78E-03 | 2.17E-04 | 47.2   | 0.661  | 4.9       | 9.9        | 25.7   | 7.6      | 11.69    | 11.87   | 9.27        | 3          | 2.18  |
| 2             | 6.21E-03 | 2.60E-04 | 47.5   | 0.690  | 5.1       | 10.2       | 25.8   | 7.6      | 11.67    | 11.82   | 9.27        | 3          | 1.30  |
| 2.5           | 6.07E-03 | 3.17E-04 | 51.7   | 0.785  | 4.2       | 10.8       | 25.2   | 7.6      | 11.72    | 11.72   | 9.27        | 3          | 1.45  |
| 3             | 6.27E-03 | 2.66E-04 | 48.2   | 0.938  | 4.2       | 11.0       | 24.9   | 7.6      | 11.68    | 11.69   | 9.27        | 3          | 1.33  |
| 5             | 5.58E-03 | 2.61E-04 | 55.3   | 0.885  | 4.1       | 11.9       | 24.9   | 7.6      | 11.64    | 11.33   | 9.27        | 3          | 1.41  |

| POPC_DHPC |          |          |       |       |     |      |      |     |       |       |      |   |      |
|-----------|----------|----------|-------|-------|-----|------|------|-----|-------|-------|------|---|------|
| 0.5       | 2.07E-02 | 3.57E-04 | 28.1  | 0.731 | 6.6 | 5.6  | 29.6 | 7.7 | 12.96 | 11.03 | 9.27 | 3 | 3.04 |
| 1         | 1.68E-02 | 1.43E-04 | 38.0  | 0.573 | 6.5 | 5.4  | 29.9 | 7.7 | 12.57 | 11.45 | 9.27 | 3 | 2.88 |
| 1.5       | 1.06E-02 | 1.28E-04 | 137.3 | 0.197 | 7.7 | 11.4 | 24.6 | 7.7 | 11.00 | 11.00 | 9.27 | 3 | 1.45 |
| 2         | 9.94E-03 | 1.20E-04 | 198.9 | 0.136 | 7.6 | 11.5 | 24.6 | 7.7 | 11.00 | 11.02 | 9.27 | 3 | 1.39 |
| 2.5       | 7.39E-03 | 1.12E-04 | 245.7 | 0.124 | 6.1 | 11.3 | 24.2 | 7.7 | 11.00 | 11.61 | 9.27 | 3 | 1.52 |
| 3         | 6.47E-03 | 1.13E-04 | 247.8 | 0.124 | 7.8 | 11.6 | 24.2 | 7.7 | 11.00 | 11.01 | 9.27 | 3 | 1.68 |
| 5         | 4.47E-03 | 8.38E-05 | 943.0 | 0.033 | 4.8 | 10.7 | 24.6 | 7.7 | 11.13 | 12.59 | 9.27 | 3 | 2.38 |

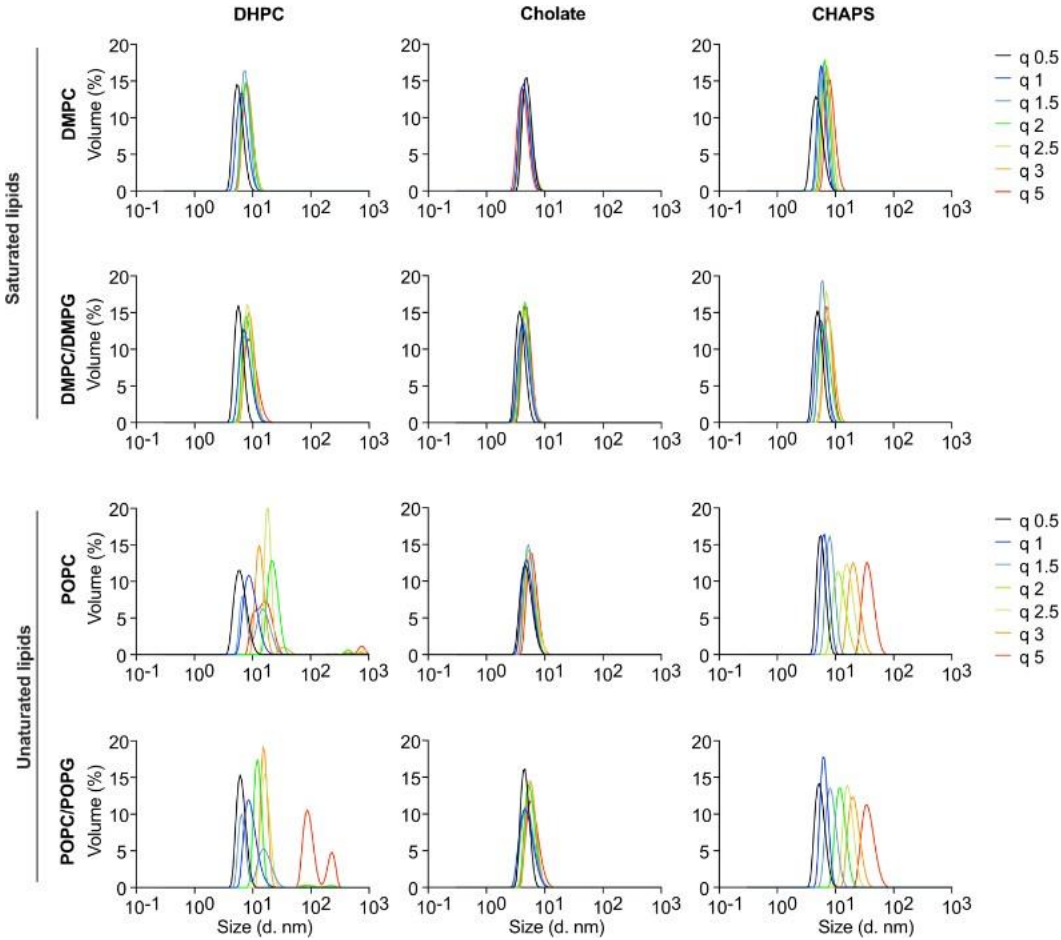

**Figure S1.** DLS size distributions of the lipid-detergent mixtures measured in this study. The curves are representative of one to three independent experiments.

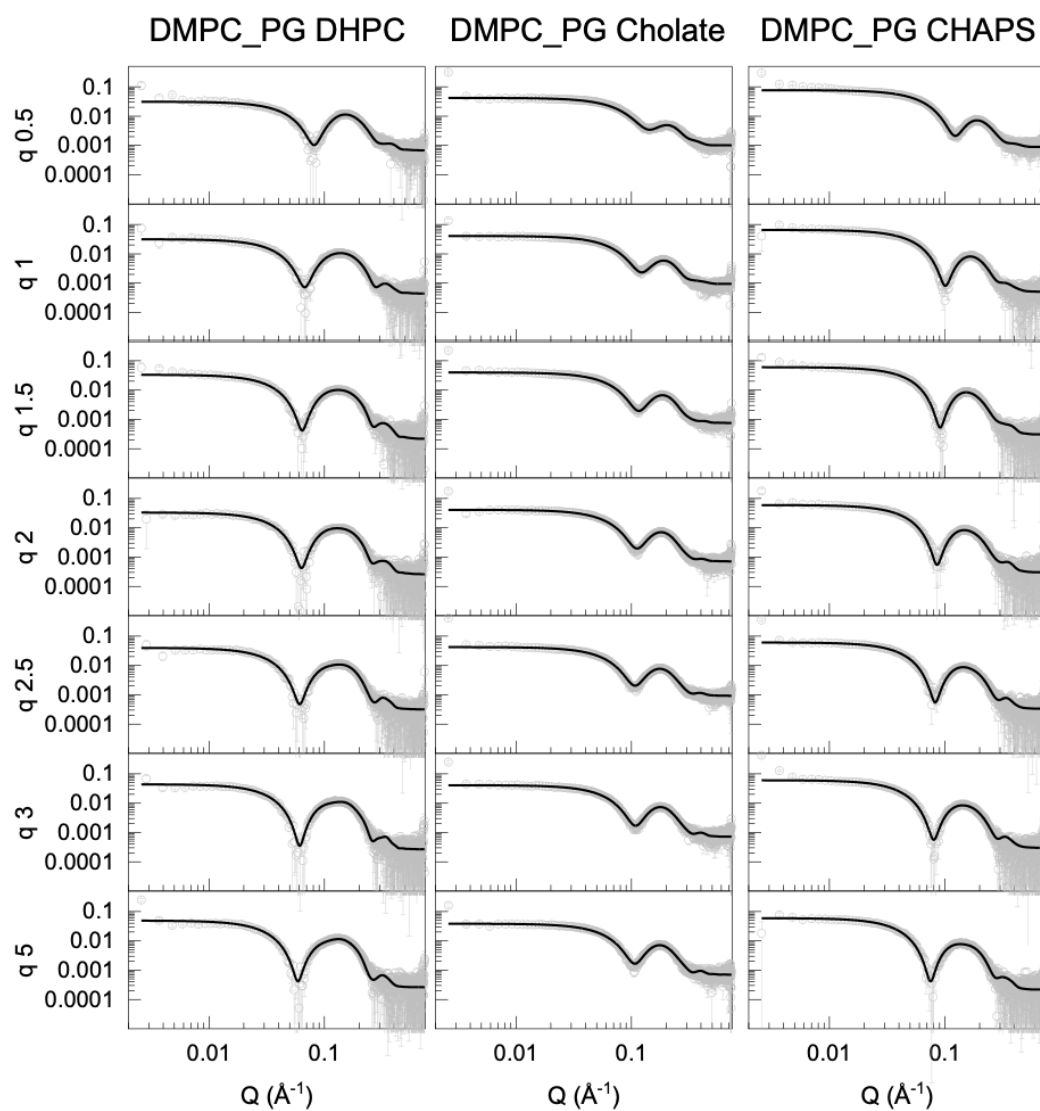

**Figure S2.** SAXS curves and best fit to the data for the systems containing DMPC-DMPG (80:20) and the three detergents.

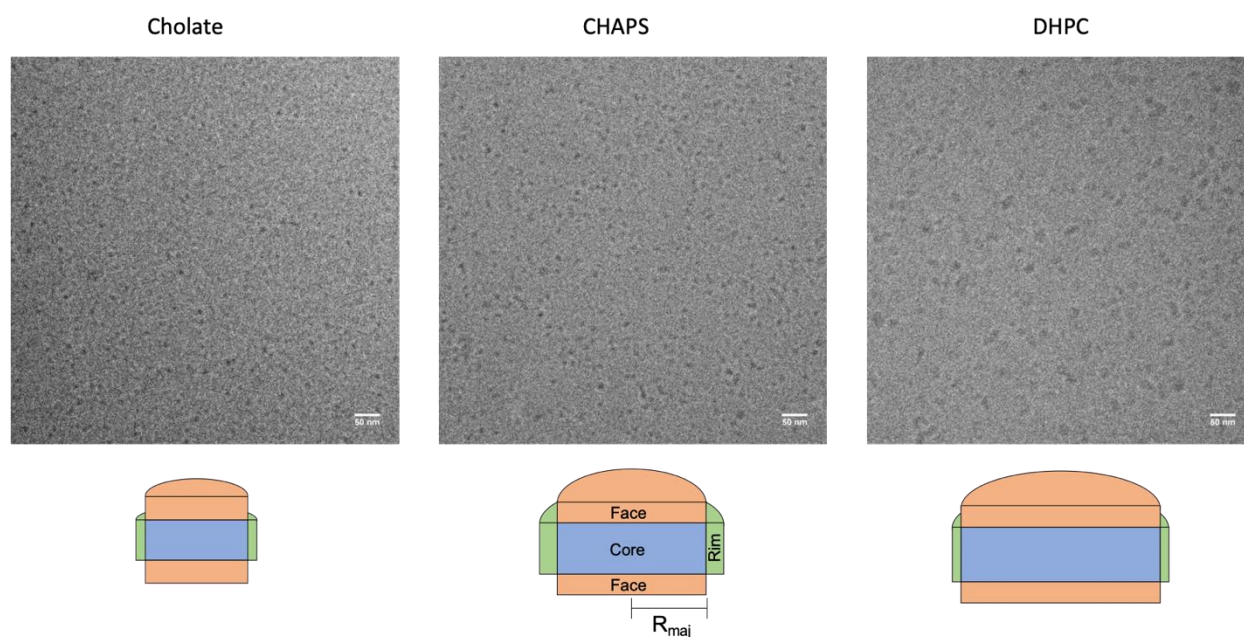

**Figure S3.** Cryo EM images of DMPC mixed with cholante (left) CHAPS (centre) and DHPC (left) at a q ratio of 2.5, scale bar = 50 nm. The schematic cartoons underneath represent the structures obtained from the fitting of the SAXS data drawn to scale using the thickness parameters obtained from the fits.

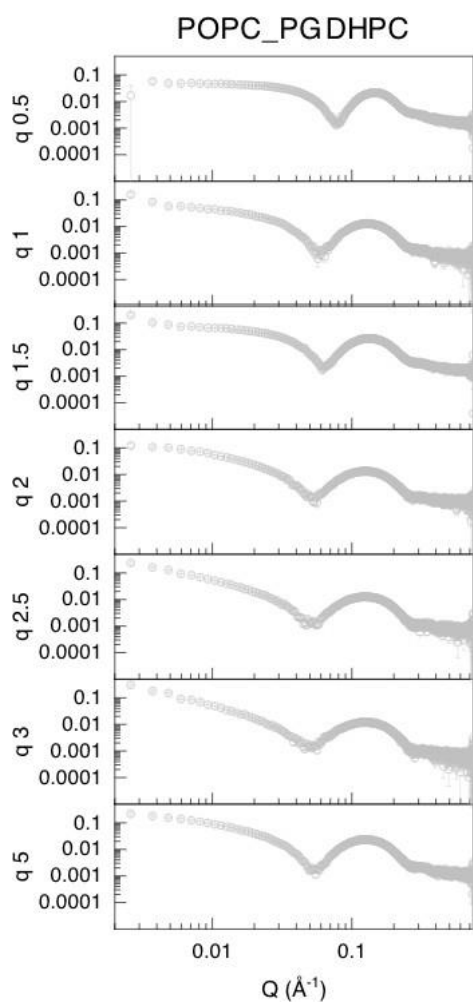

**Figure S4.** SAXS curves for the POPC-POPG (80:20) samples mixed with DHPC.

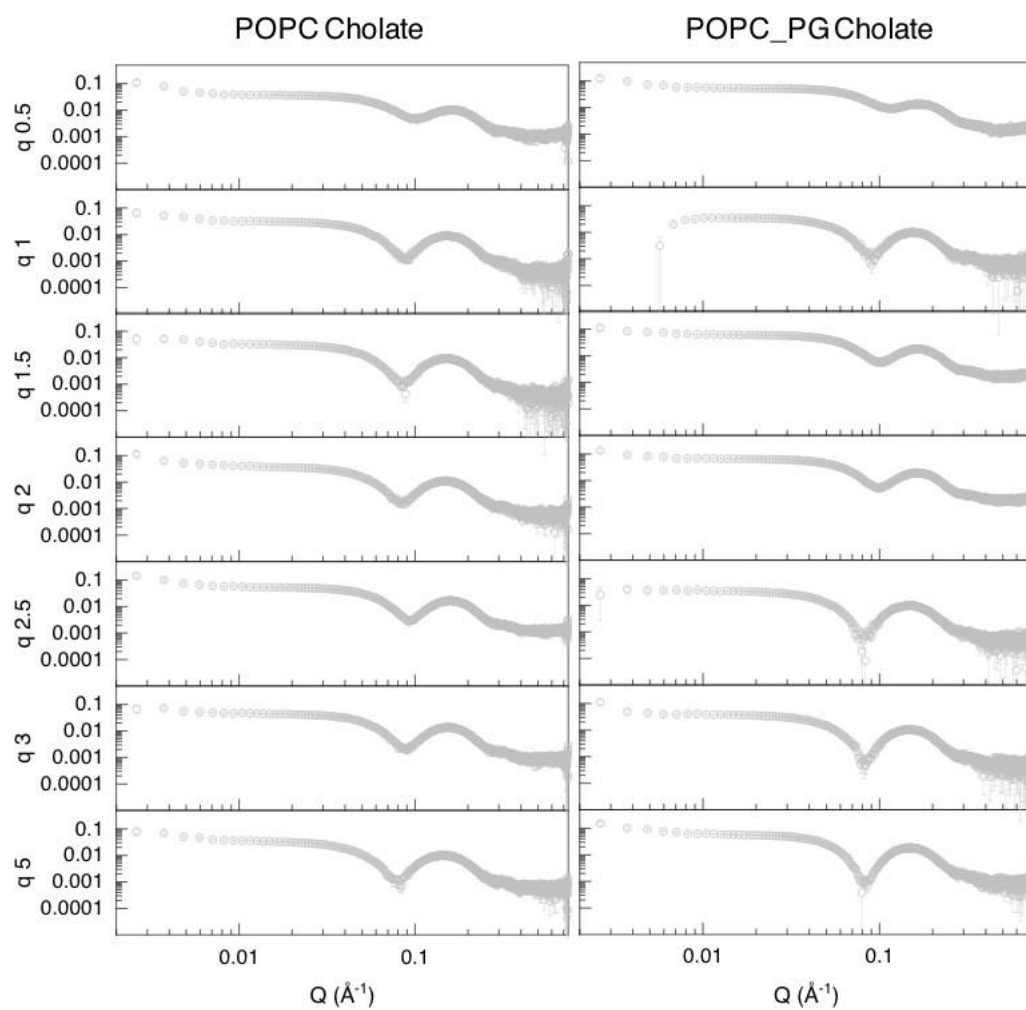

**Figure S5.** SAXS curves for the POPC and POPC-POPG (80:20) samples mixed with sodium cholate.

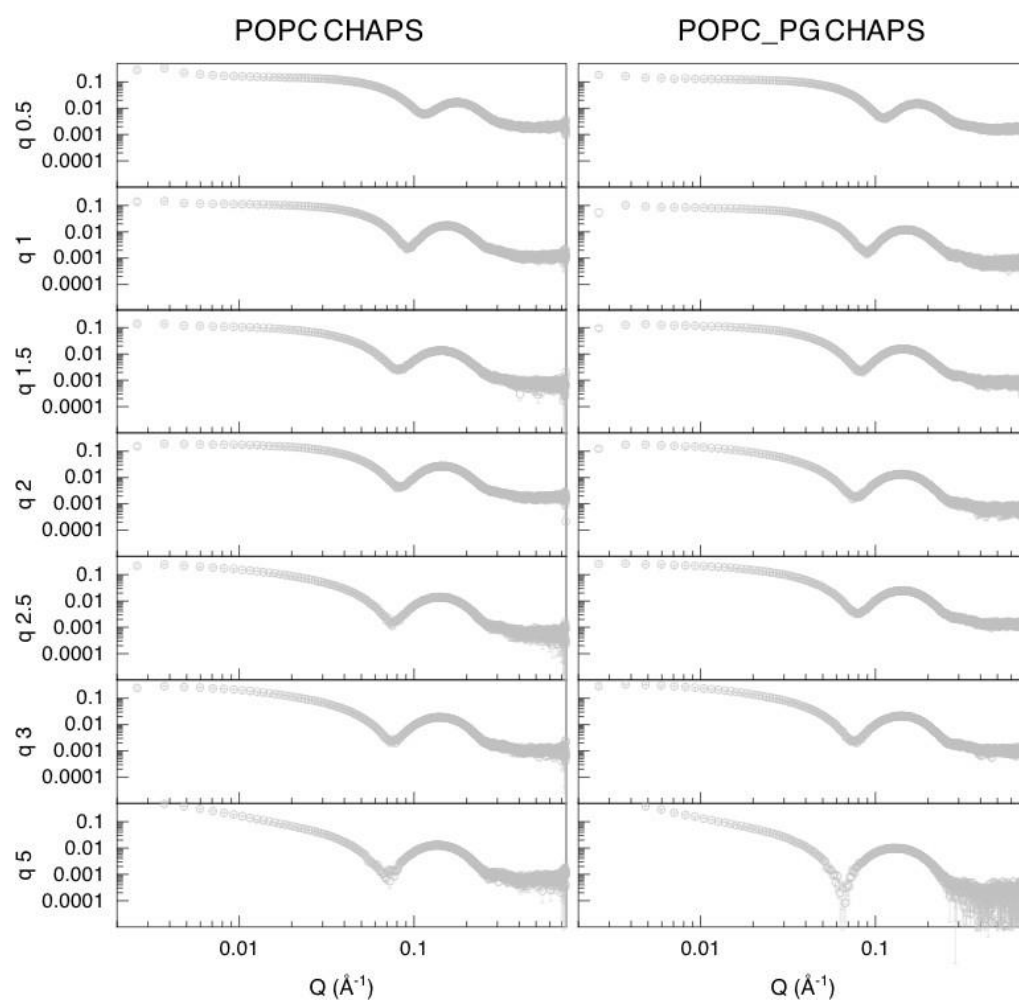

**Figure S6.** SAXS curves for the POPC and POPC-POPG (80:20) samples mixed with CHAPS.

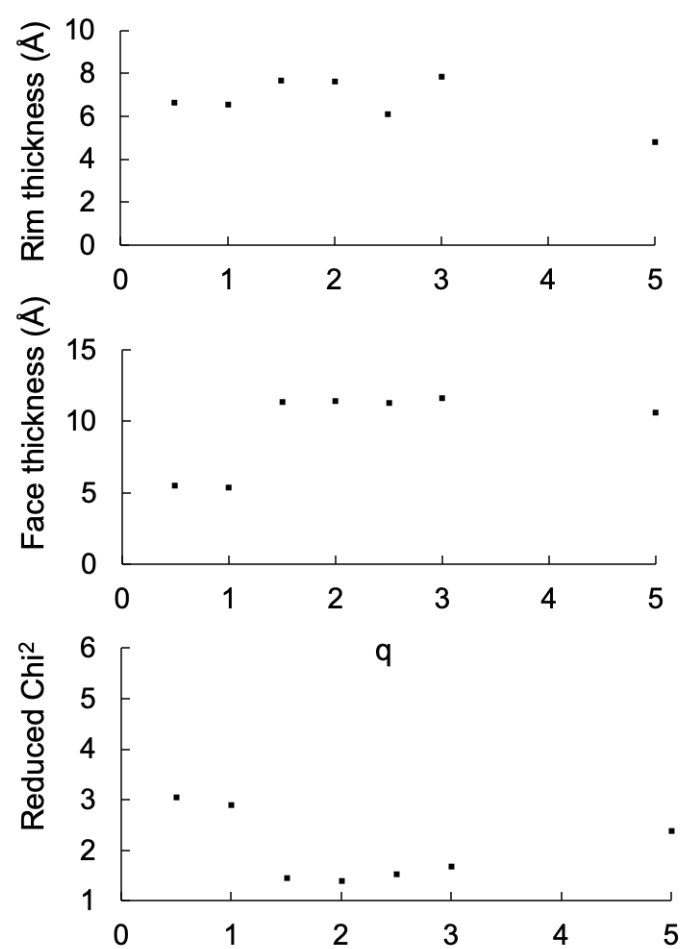

**Figure S7.** Remaining fit parameters for the POPC-DHPC fits.

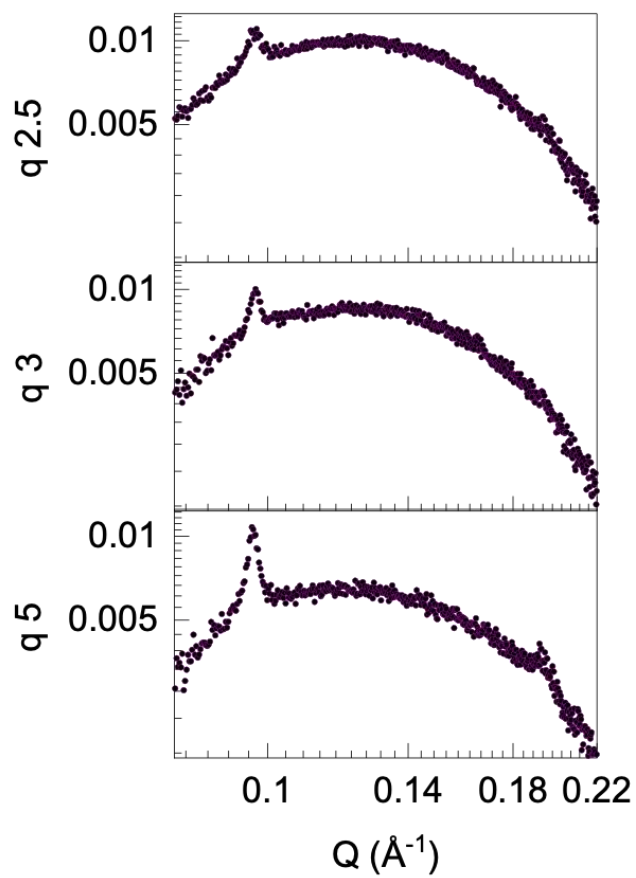

**Figure S8.** Evolution of the Bragg peaks in the POPC-DHPC sample at  $q = 2.5$ ,  $q = 3$  and  $q = 5$ .
